# Supplementary material for: Differential diagnosis of human lung tumors using surface desorption atmospheric pressure chemical ionization imaging mass spectrometry
Source: Royal Society of Chemistry journal article supplement (doi:10.1039/c7ra11839b), 2017-01-01
Supplement: c7ra11839b1.pdf [file c7ra11839b1.pdf]

# Differential Diagnosis of Human Lung Tumors Using Surface Desorption Atmospheric Pressure Chemical Ionization Imaging Mass Spectrometry

Yongzhong Ouyang<sup>a\*</sup>, Junwen Liu<sup>b</sup>, Baohua Nie<sup>c</sup>, Naiping Dong<sup>d</sup>, Xin Chen<sup>a</sup>, Linfei Chen<sup>b</sup> and YiPing Wei<sup>e</sup>

<sup>a</sup>*School of Environmental and Chemical Engineering, Foshan University, Foshan, Guangdong 528000, P. R. China.*

<sup>b</sup>*School of Chemistry, Biological and Materials Sciences, East China University of Technology, Nanchang, Jiangxi 330006, P. R. China.*

<sup>c</sup>*School of Materials Science and Energy Engineering, Foshan University, Foshan, Guangdong 528000, P. R. China.*

<sup>d</sup>*Department of Applied Biology and Chemical Technology, the Hong Kong Polytechnic University, Hung Hom, Kowloon, Hong Kong.*

<sup>e</sup>*Department of Cardiothoracic Surgery to Second Affiliated Hospital of Nanchang University, Nanchang, Jiangxi 330006, P. R. China.*

Prepared for **RSC Advances**

October 27, 2017

\* Corresponding author:

Prof. Yongzhong Ouyang

<sup>a</sup>*School of Environmental and Chemical Engineering, Foshan University, Foshan, Guangdong 528000, P. R. China.*

*Email: ouyang7492@163.com*

*Tel.: +86-757-83963780*

*Fax: +86-757-83963780*

## Supplementary Information

**Table S1.** Histological description of patients from 14 research subjects.

**Figure S1.** Tandem mass spectrometry (MS/MS) spectra of multiple potential biomarkers for distinguishing tumor and adjacent normal tissue using multivariate statistical analyses

**Figure S2.** PCA analysis of DAPCI-MSI data in the positive ion mode. (a) 3D plot of PCA score results for the differentiation of the tumor from adjacent normal lung tissue. (b) PCA loading results for the PCs

**Figure S3.** DAPCI-MS images of selected potential biomarkers using multivariate statistical analyses for the research subject A4 tissue section showing the spatial distributions of ions at (a)  $m/z$  104.1  $[C_5H_{14}NO]^+$ , (b) 175.2  $[C_6H_{15}N_4O_2]^+$ , (c) 184.2  $[C_5H_{15}NO_4p]^+$ , (d)  $m/z$  741.3  $[SM(16:0)+K]^+$ , (e)  $m/z$  810.6  $[PC(36:1)+Na]^+$ , (f)  $m/z$  826.6  $[PC(36:1)+K]^+$ , (g)  $m/z$  834.6  $[PC(38:3)+Na]^+$ , (h)  $m/z$  848.6  $[PC(38:4)+K]^+$ , and  $m/z$  850.6  $[PC(38:3)+K]^+$  (a) Light microscopy images of the H&E-stained sections are shown. (Scale bars)

**Table S1.** Histological description of patients from 14 research subjects.

| <b>Number</b> | <b>sex</b> | <b>Age</b> | <b>Tumor type</b>       | <b>Histopathological grading</b> |
|---------------|------------|------------|-------------------------|----------------------------------|
| <b>A1</b>     | Male       | 64         | Squamous cell carcinoma | Moderate differentiated          |
| <b>A2</b>     | Male       | 47         | Squamous cell carcinoma | Poorly differentiated            |
| <b>A3</b>     | Male       | 61         | Squamous cell carcinoma | Moderate differentiated          |
| <b>A4</b>     | Male       | 73         | Squamous cell carcinoma | Moderate differentiated          |
| <b>A5</b>     | Male       | 57         | Squamous cell carcinoma | Moderate differentiated          |
| <b>A6</b>     | Male       | 63         | Squamous cell carcinoma | Moderate differentiated          |
| <b>A7</b>     | Male       | 66         | Squamous cell carcinoma | Moderate differentiated          |
| <b>A8</b>     | Male       | 61         | Squamous cell carcinoma | Moderate differentiated          |
| <b>A9</b>     | Female     | 62         | Squamous cell carcinoma | Moderate differentiated          |
| <b>A10</b>    | Male       | 59         | Squamous cell carcinoma | Moderate differentiated          |
| <b>A11</b>    | Male       | 70         | Squamous cell carcinoma | Moderate differentiated          |
| <b>A12</b>    | Male       | 48         | Squamous cell carcinoma | Moderate differentiated          |
| <b>A13</b>    | Male       | 57         | Squamous cell carcinoma | Moderate differentiated          |
| <b>A14</b>    | Male       | 61         | Squamous cell carcinoma | Poorly differentiated            |

Figure S1. Tandem mass spectrometry (MS/MS) spectra of multiple potential biomarkers for distinguishing tumor and adjacent normal tissue using multivariate statistical analyses

(a)  $m/z$  725.6

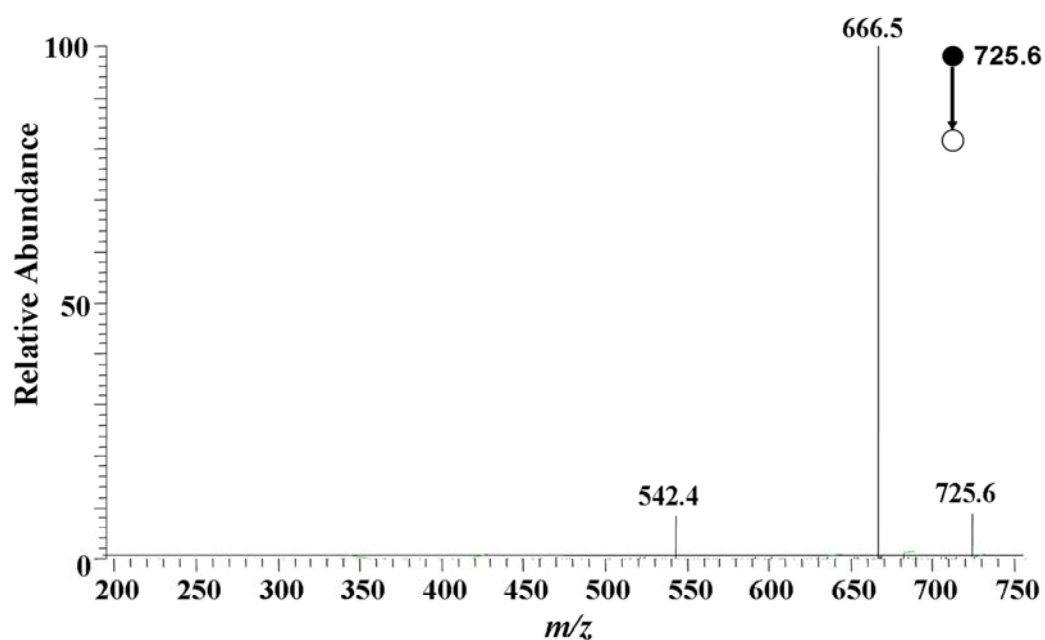

(b)  $m/z$  756.6

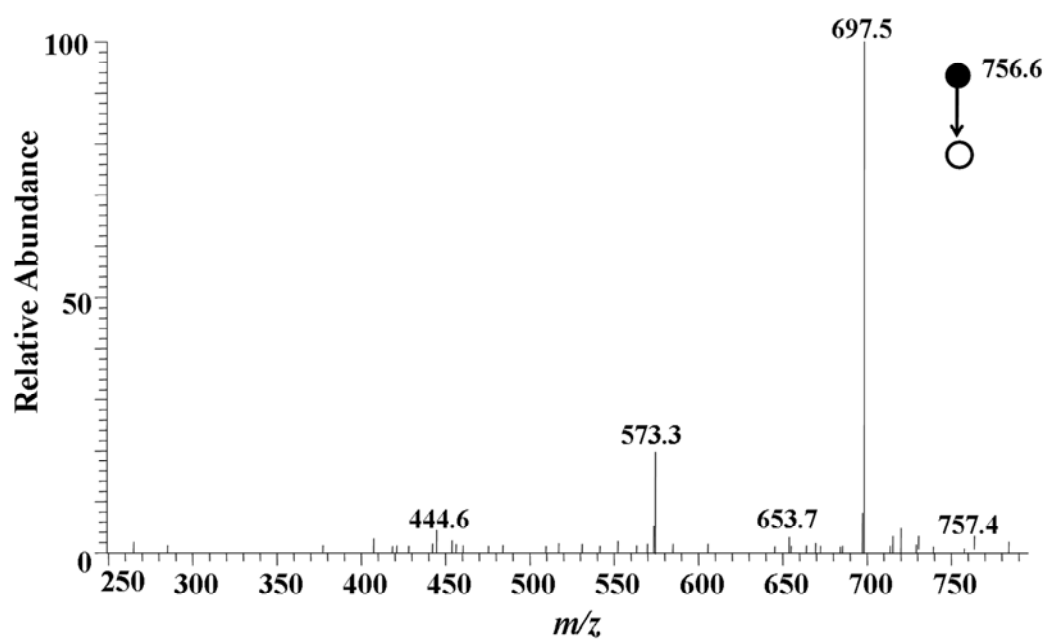

(c)  $m/z$  772.5

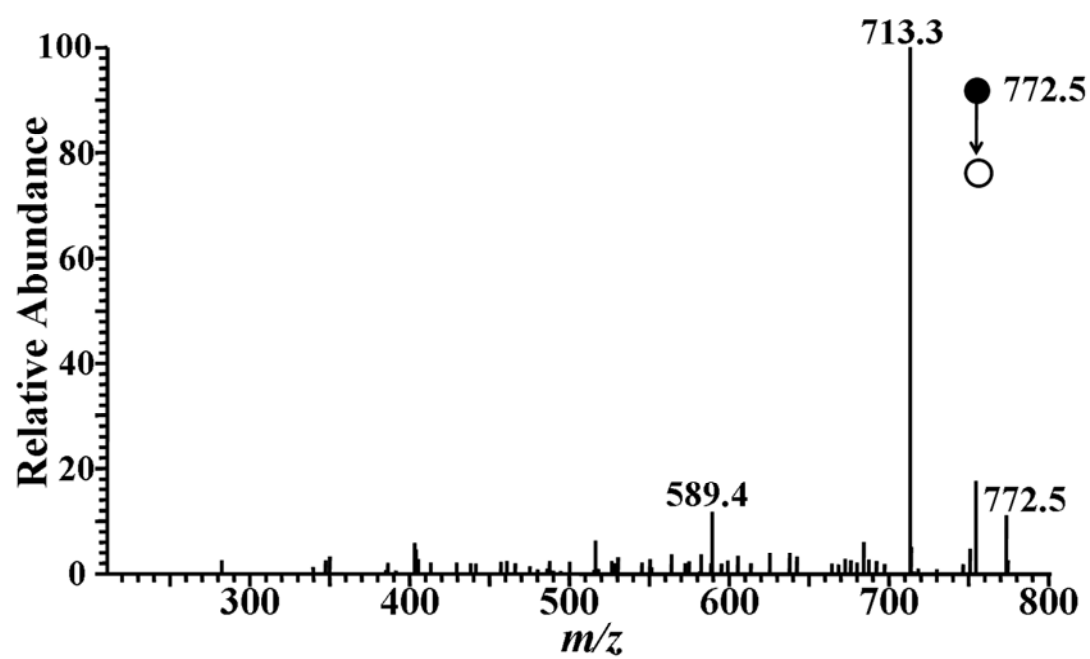

(d)  $m/z$  782.6

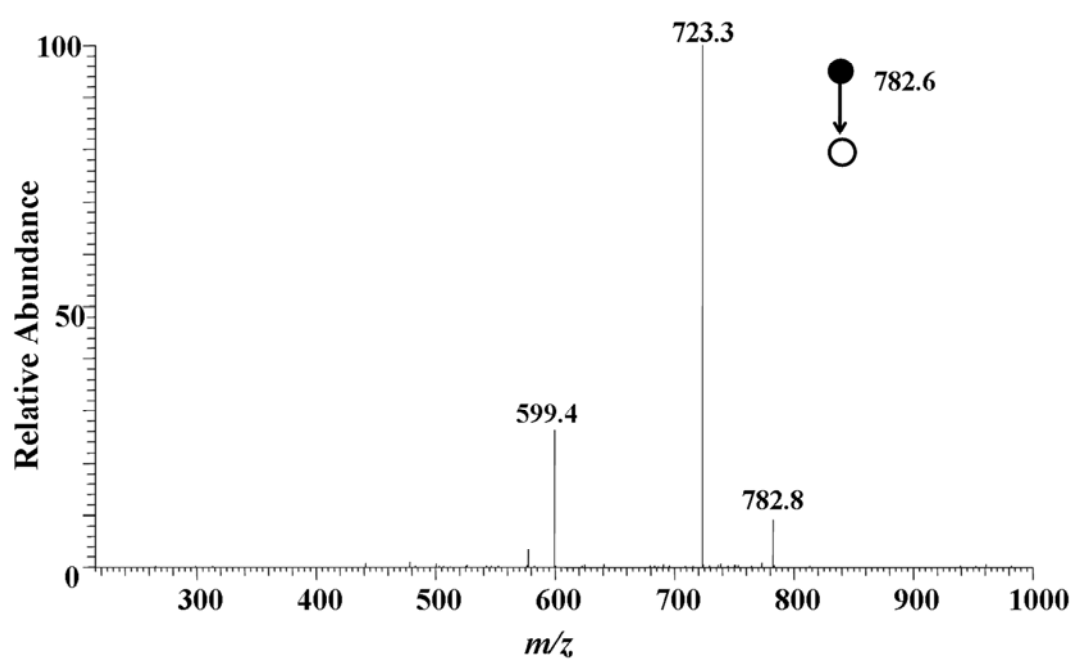

(e)  $m/z$  798.5

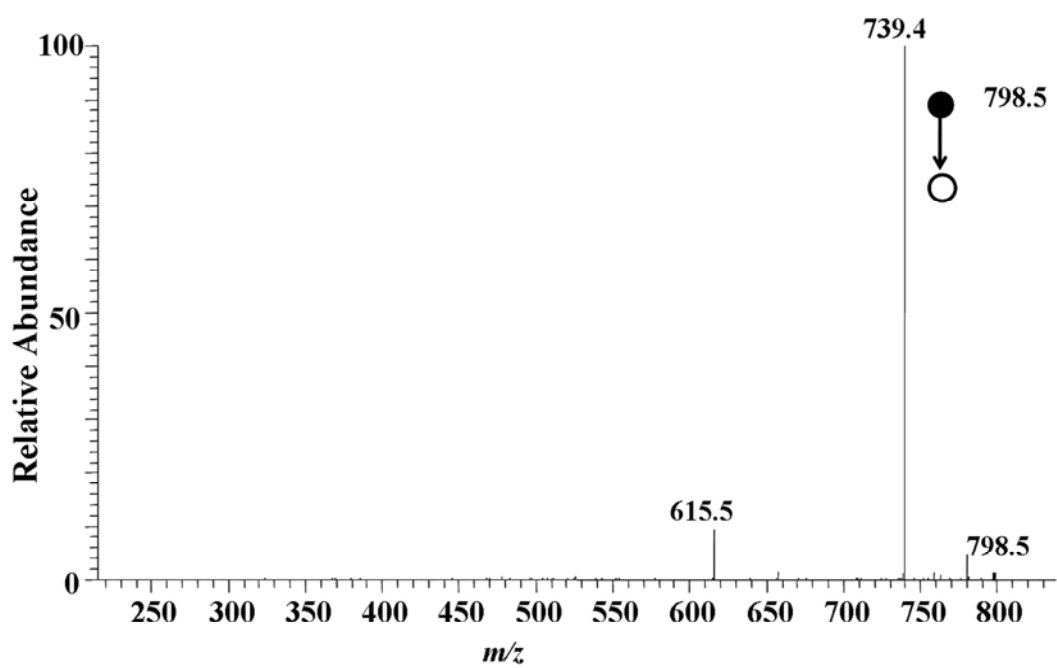

(f)  $m/z$  808.6

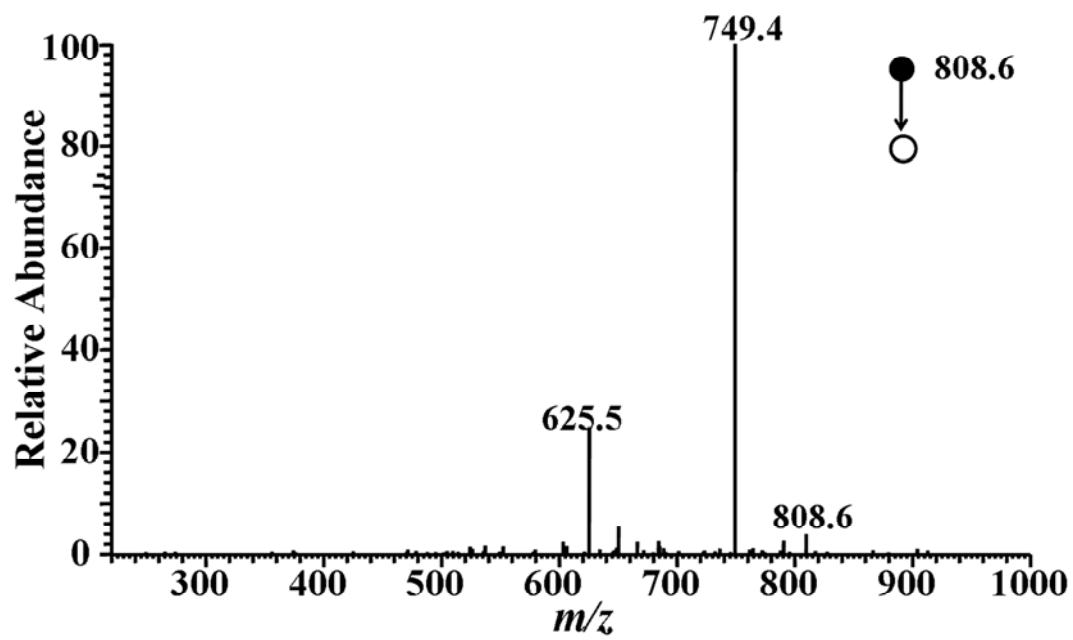

(g)  $m/z$  824.6

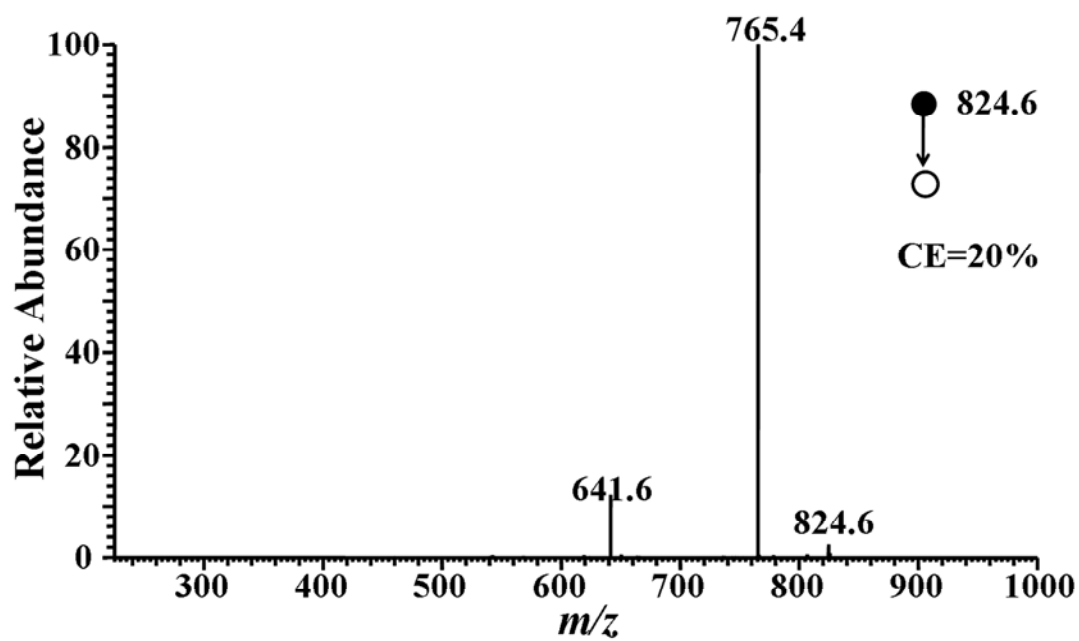

(f)  $m/z$  104.1

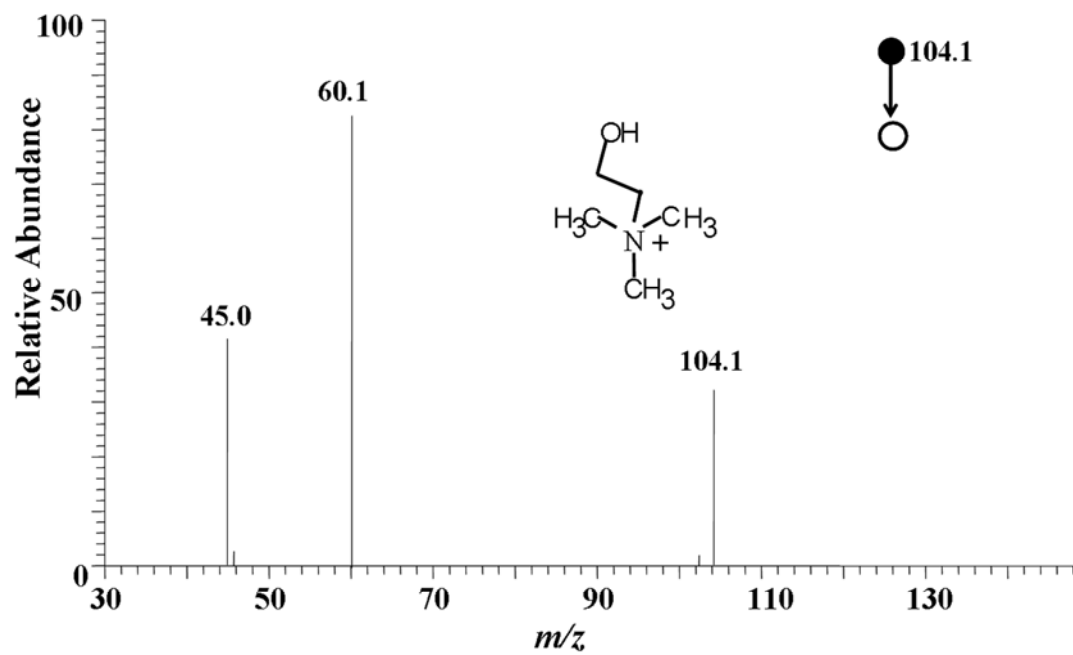

(g)  $m/z$  175.2

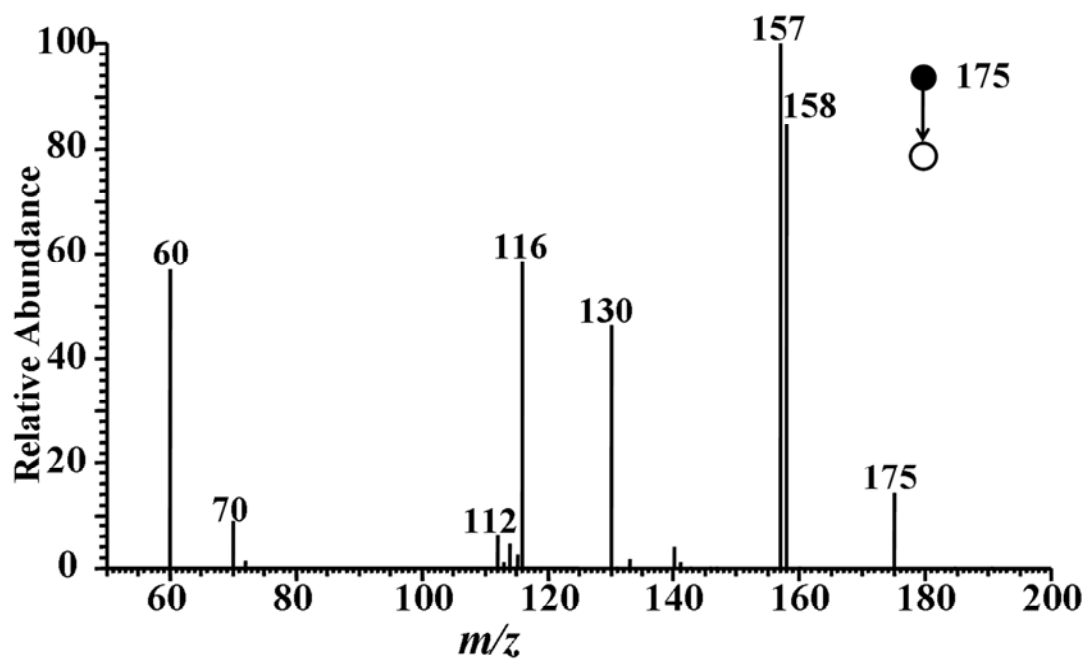

(h)  $m/z$  184.2

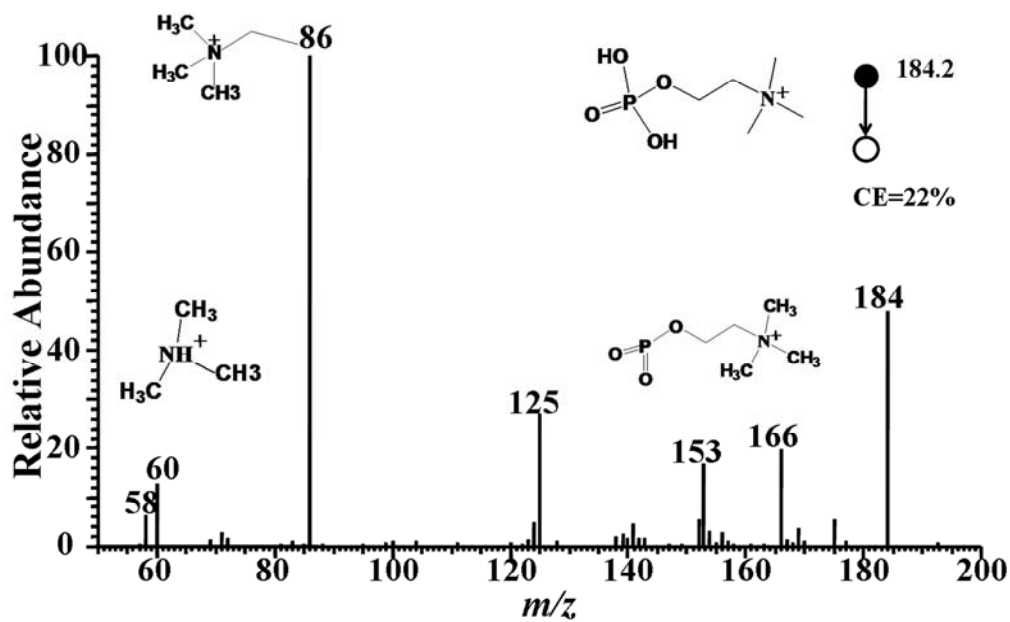



(I)  $m/z$  741.3

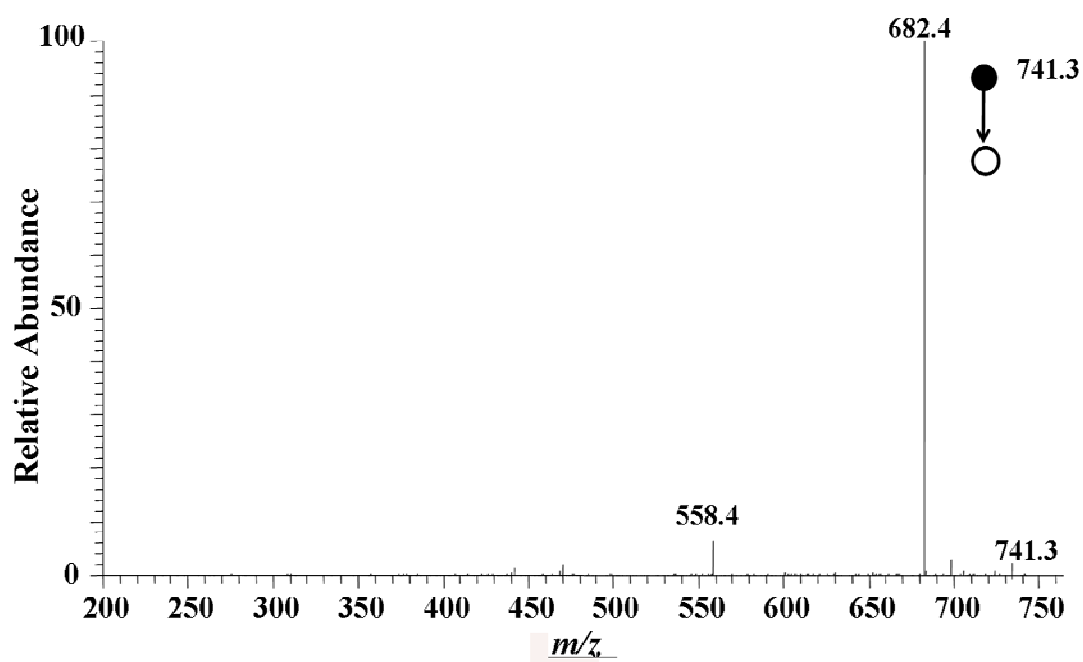

(J)  $m/z$  810.6

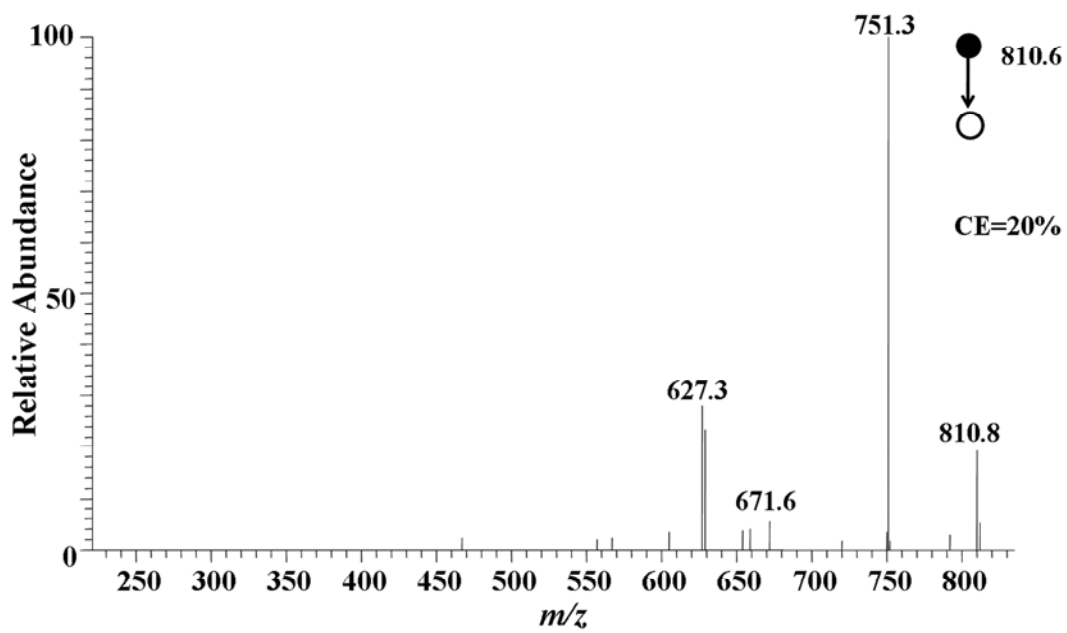

(K)  $m/z$  824.6

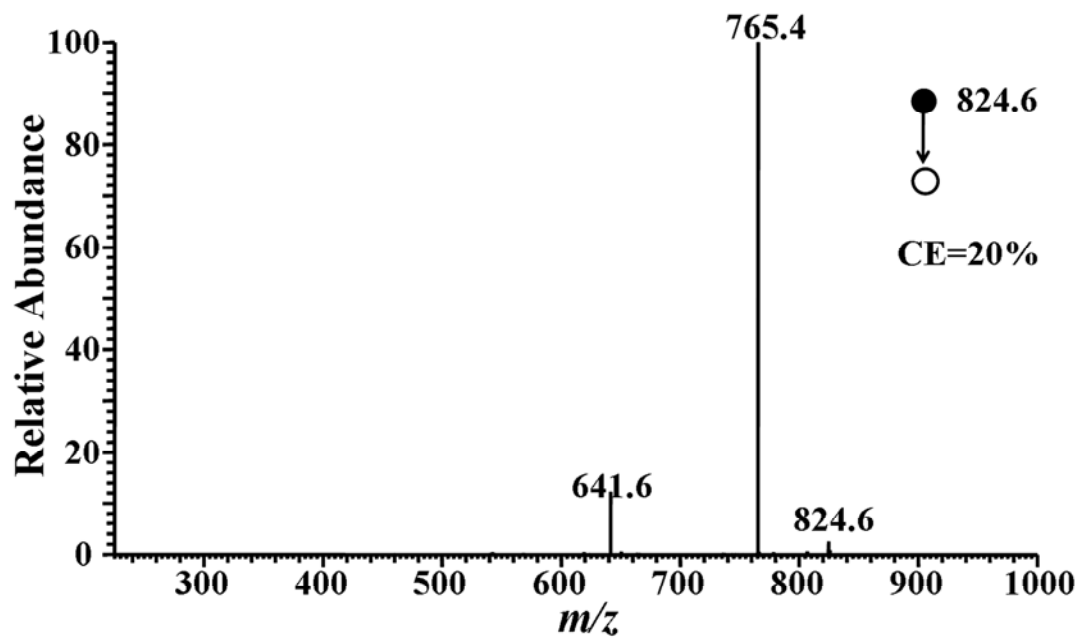

(L)  $m/z$  834.6

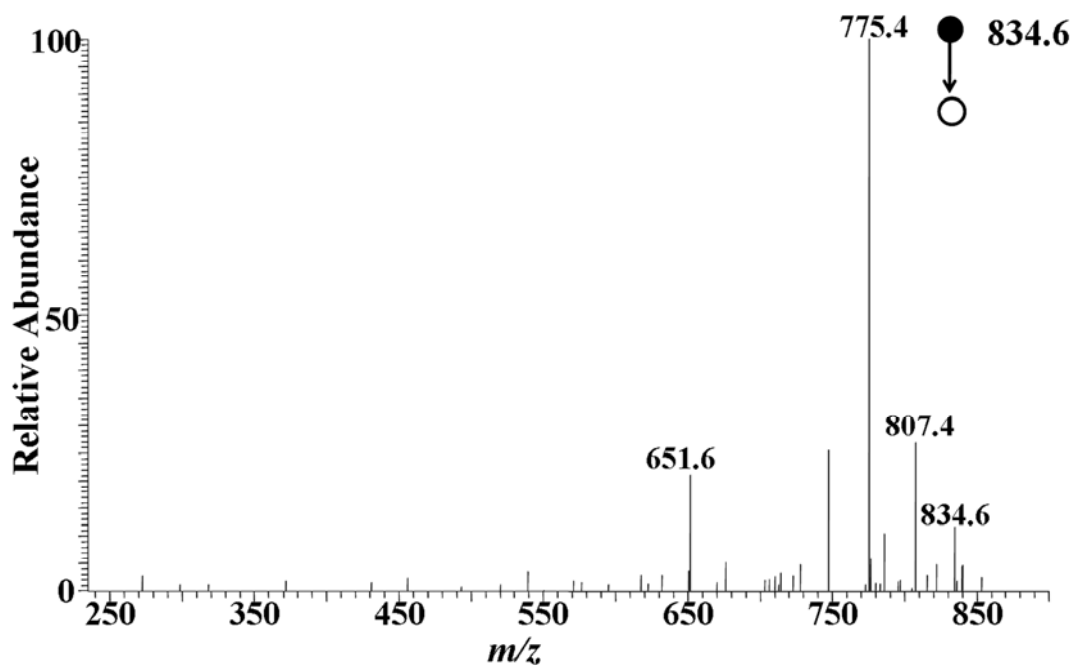

(M)  $m/z$  848.6

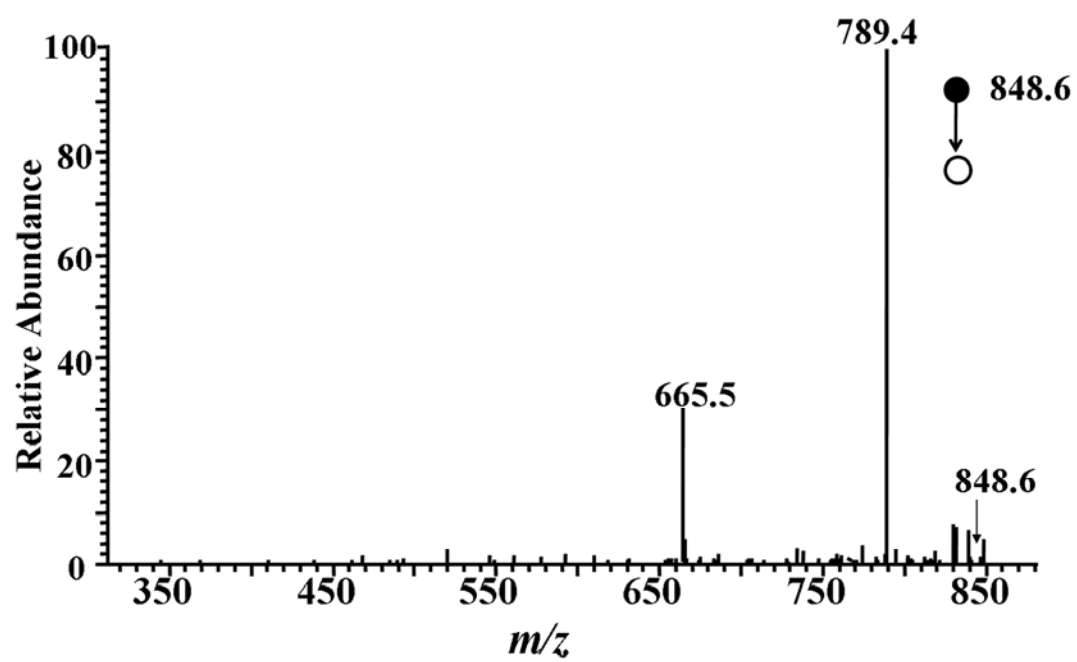

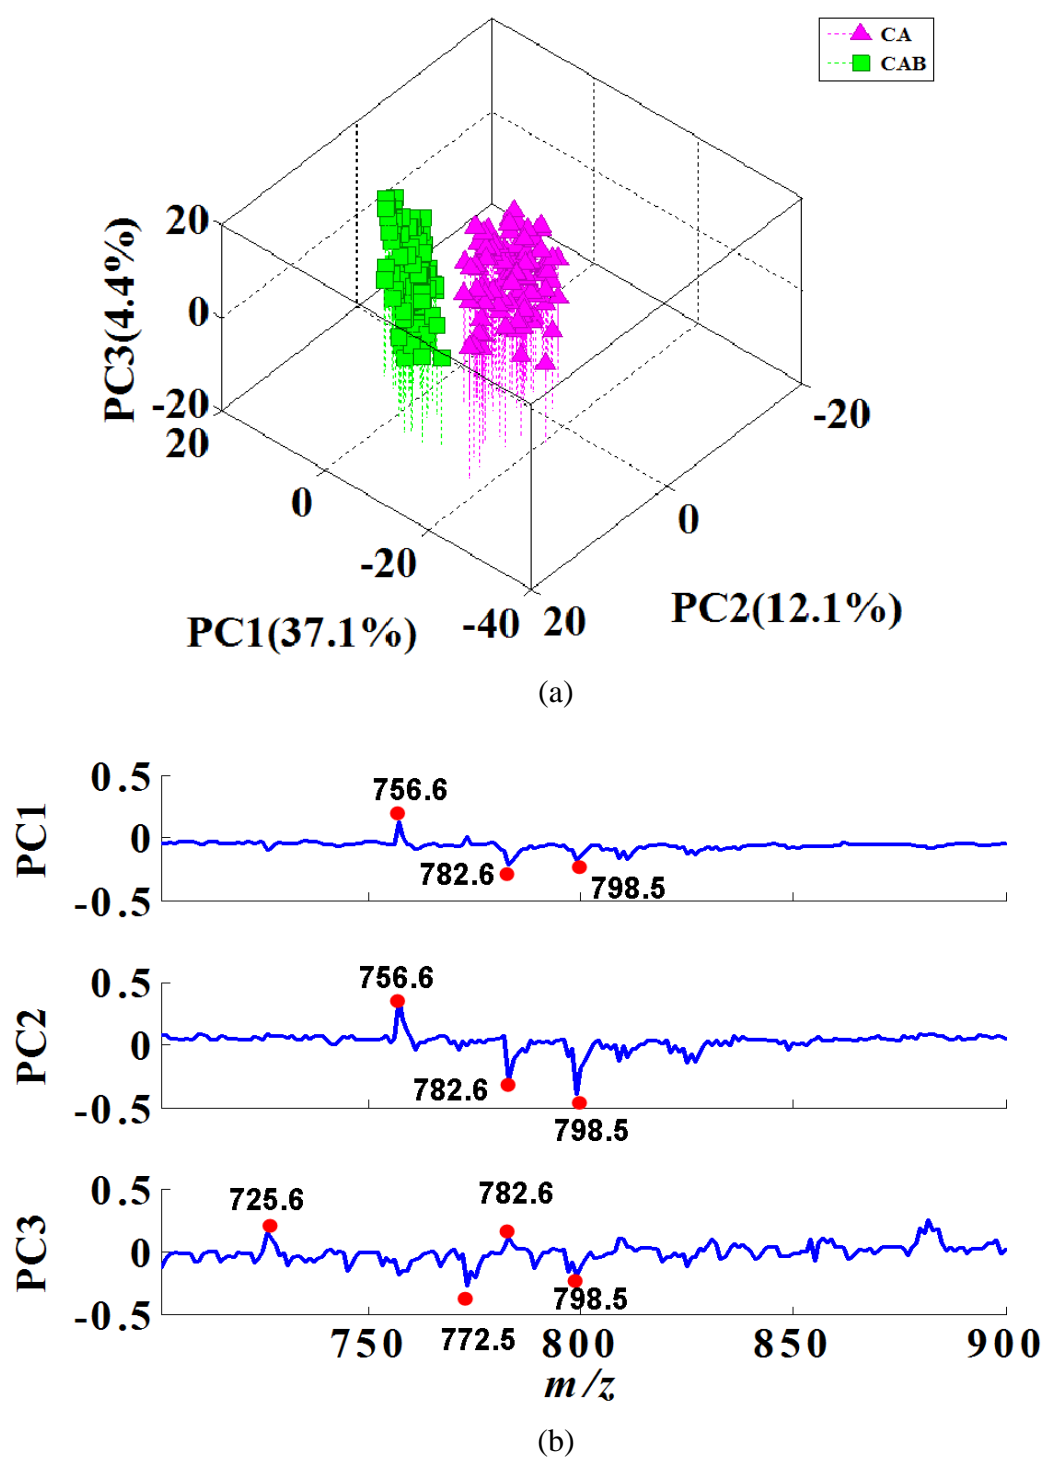

Figure S2. PCA analysis of DAPCI-MSI data in the positive ion mode. (a) 3D plot of PCA score results for the differentiation of the tumor from adjacent normal lung tissue. (b) PCA loading results for the PCs

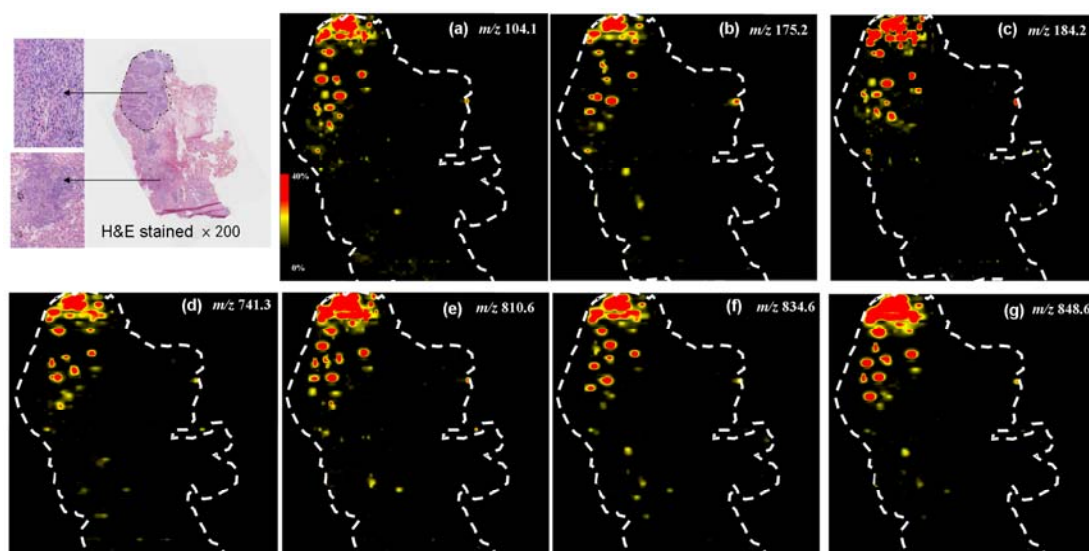

Figure S3. DAPCI-MS images of selected potential biomarkers using multivariate statistical analyses for the research subject A4 tissue section showing the spatial distributions of ions at (a)  $m/z$  104.1 [ $C_5H_{14}NO$ ] $^+$ , (b)  $m/z$  175.2 [ $C_6H_{15}N_4O_2$ ] $^+$ , (c)  $m/z$  184.2 [ $C_5H_{15}NO_4p$ ] $^+$ , (d)  $m/z$  741.3 [ $SM(16:0)+K$ ] $^+$ , (e)  $m/z$  810.6 [ $PC(36:1)+Na$ ] $^+$ , (f)  $m/z$  834.6 [ $PC(38:3)+Na$ ] $^+$ , and (g)  $m/z$  848.6 [ $PC(38:4)+K$ ] $^+$ . (a) Light microscopy images of the H&E-stained sections are shown. (scale bars)
